# Supplementary material
Source: Springer Nature journal article supplement (https://www.springermedizin.de/resource/supplementary/13054_2012_657_MOESM1_ESM.pdf/9708952)
Supplement: MOESM1 [file 9708952]

### **Control group**

Patients with brain  
death diagnosis  
01/2005 – 06/2008  
**n = 197**

Missing  
data  
**n = 134**

Patients with  
available data  
**n = 63**

Matching

No  
matched  
patients  
**n = 36**

Control group  
**n = 27**

### **RM group**

Patients with brain  
death diagnosis  
06/2008 – 12/2009  
**n = 27**

Missing  
data  
**n = 0**

Patients with  
available data  
**n = 27**

RM group  
**n = 27**
